# Supplementary material
Source: bioRxiv or medRxiv preprint supplement (https://www.biorxiv.org/highwire/filestream/29040/field_highwire_adjunct_files/6/102145-7.pdf)

### type II interferon pathway

### type I interferon pathway

Day 3

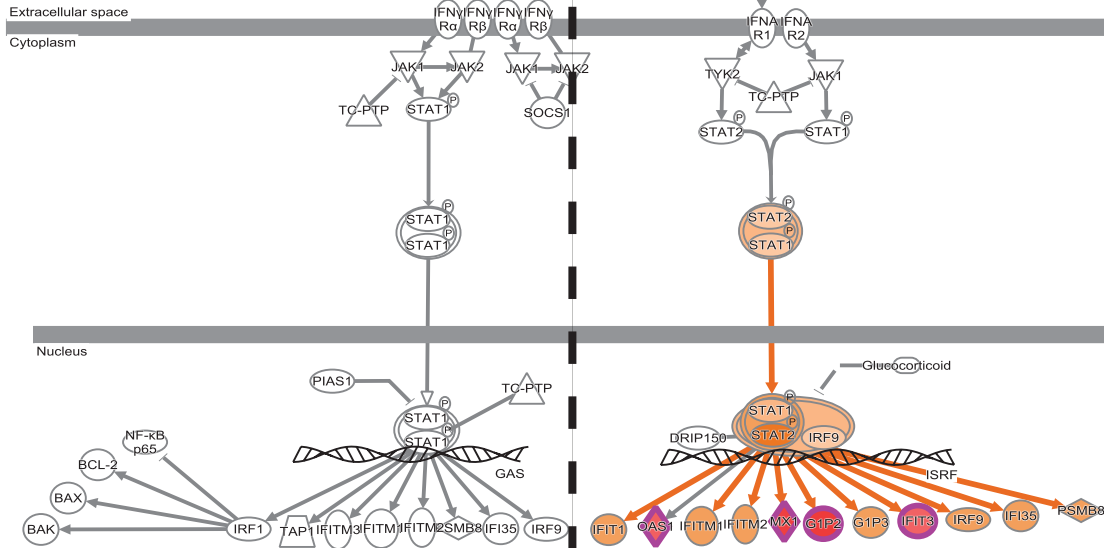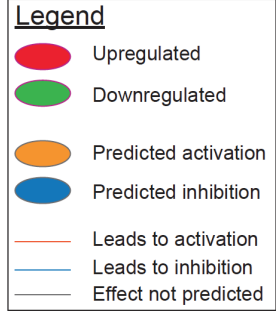

Day 7

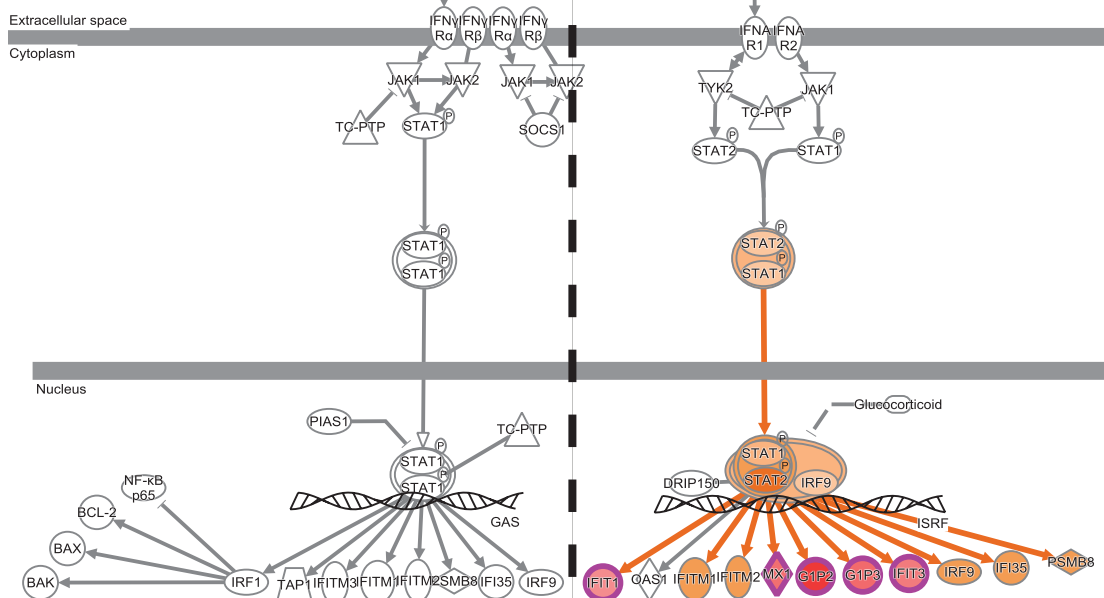

Day 9

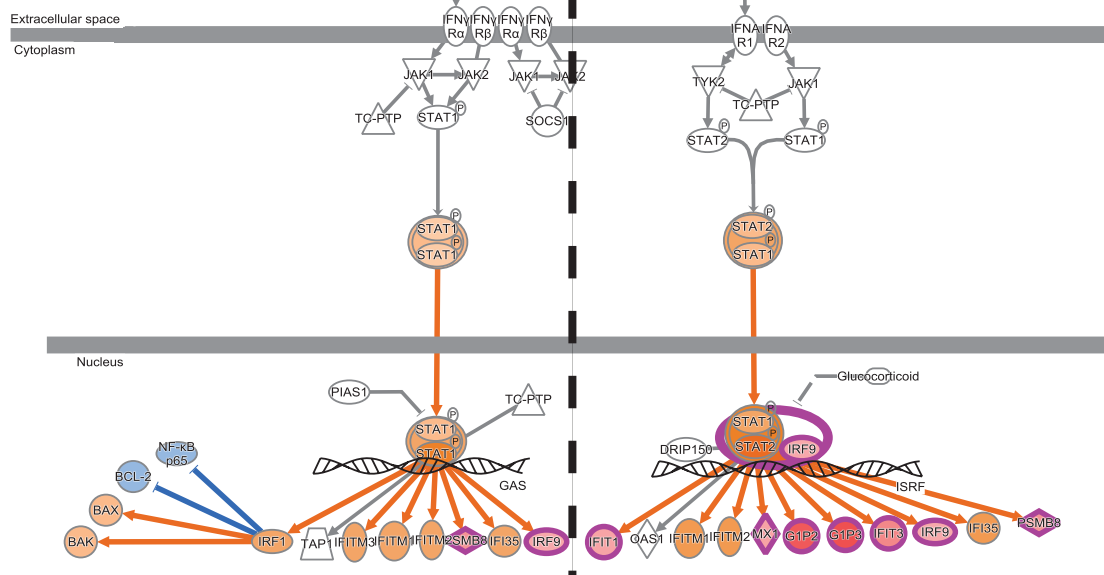

Supplement: Supplementary file [file 102145-7.pdf]
